# Supplementary material
Source: publisher figshare collection journal article supplement (https://karger.figshare.com/ndownloader/files/8716240)
Supplement: Supplementary file 1 [file 8716240]

**Supplementary Material**

**Supplementary Table S1.** Primer sequences used in quantitative real-time PCR.

| Gene Name | GenBank Accession | Amplicon Size | Sequence (5' -> 3') | |
| --- | --- | --- | --- | --- |
| IL4 | NM_021283 | 102 | FWRV | GGTCTCAACCCCCAGCTAGT GCCGATGATCTCTCTCAAGTGT |
| IL6 | NM_031168 | 76 | FWRV | TAGTCCTTCCTACCCCAATTTCC TTGGTCCTTAGCCACTCCTTC |
| IL10 | NM_010548 | 105 | FW RV | GCTCTTACTGACTGGCATGAG CGCAGCTCTAGGAGCATGTG |
| IL13 | NM_008355 | 116 | FWRV | CCTGGCTCTTGCTTGCCTT GGTCTTGTGTGATGTTGCTCA |
| IL18 | NM_008360 | 169 | FW RV | GACTCTTGCGTCAACTTCAAGG CAGGCTGTCTTTTGTCAACGA |
| IFNϒ | NM_008337 | 157 | FW RV | TAGCCAAGACTGTGATTGCGG AGACATCTCCTCCCATCAGCAG |
| mMCP-1 | NM_008570 | 237 | FWRV | AAACAGTCATAAATGGCAAG GGGAACAAACCATCATCAC |
| HPRT1 | NM_013556 | 124 | FWRV | TGGATACAGGCCAGACTTTGTT CAGATTCAACTTGCGCTCATC |


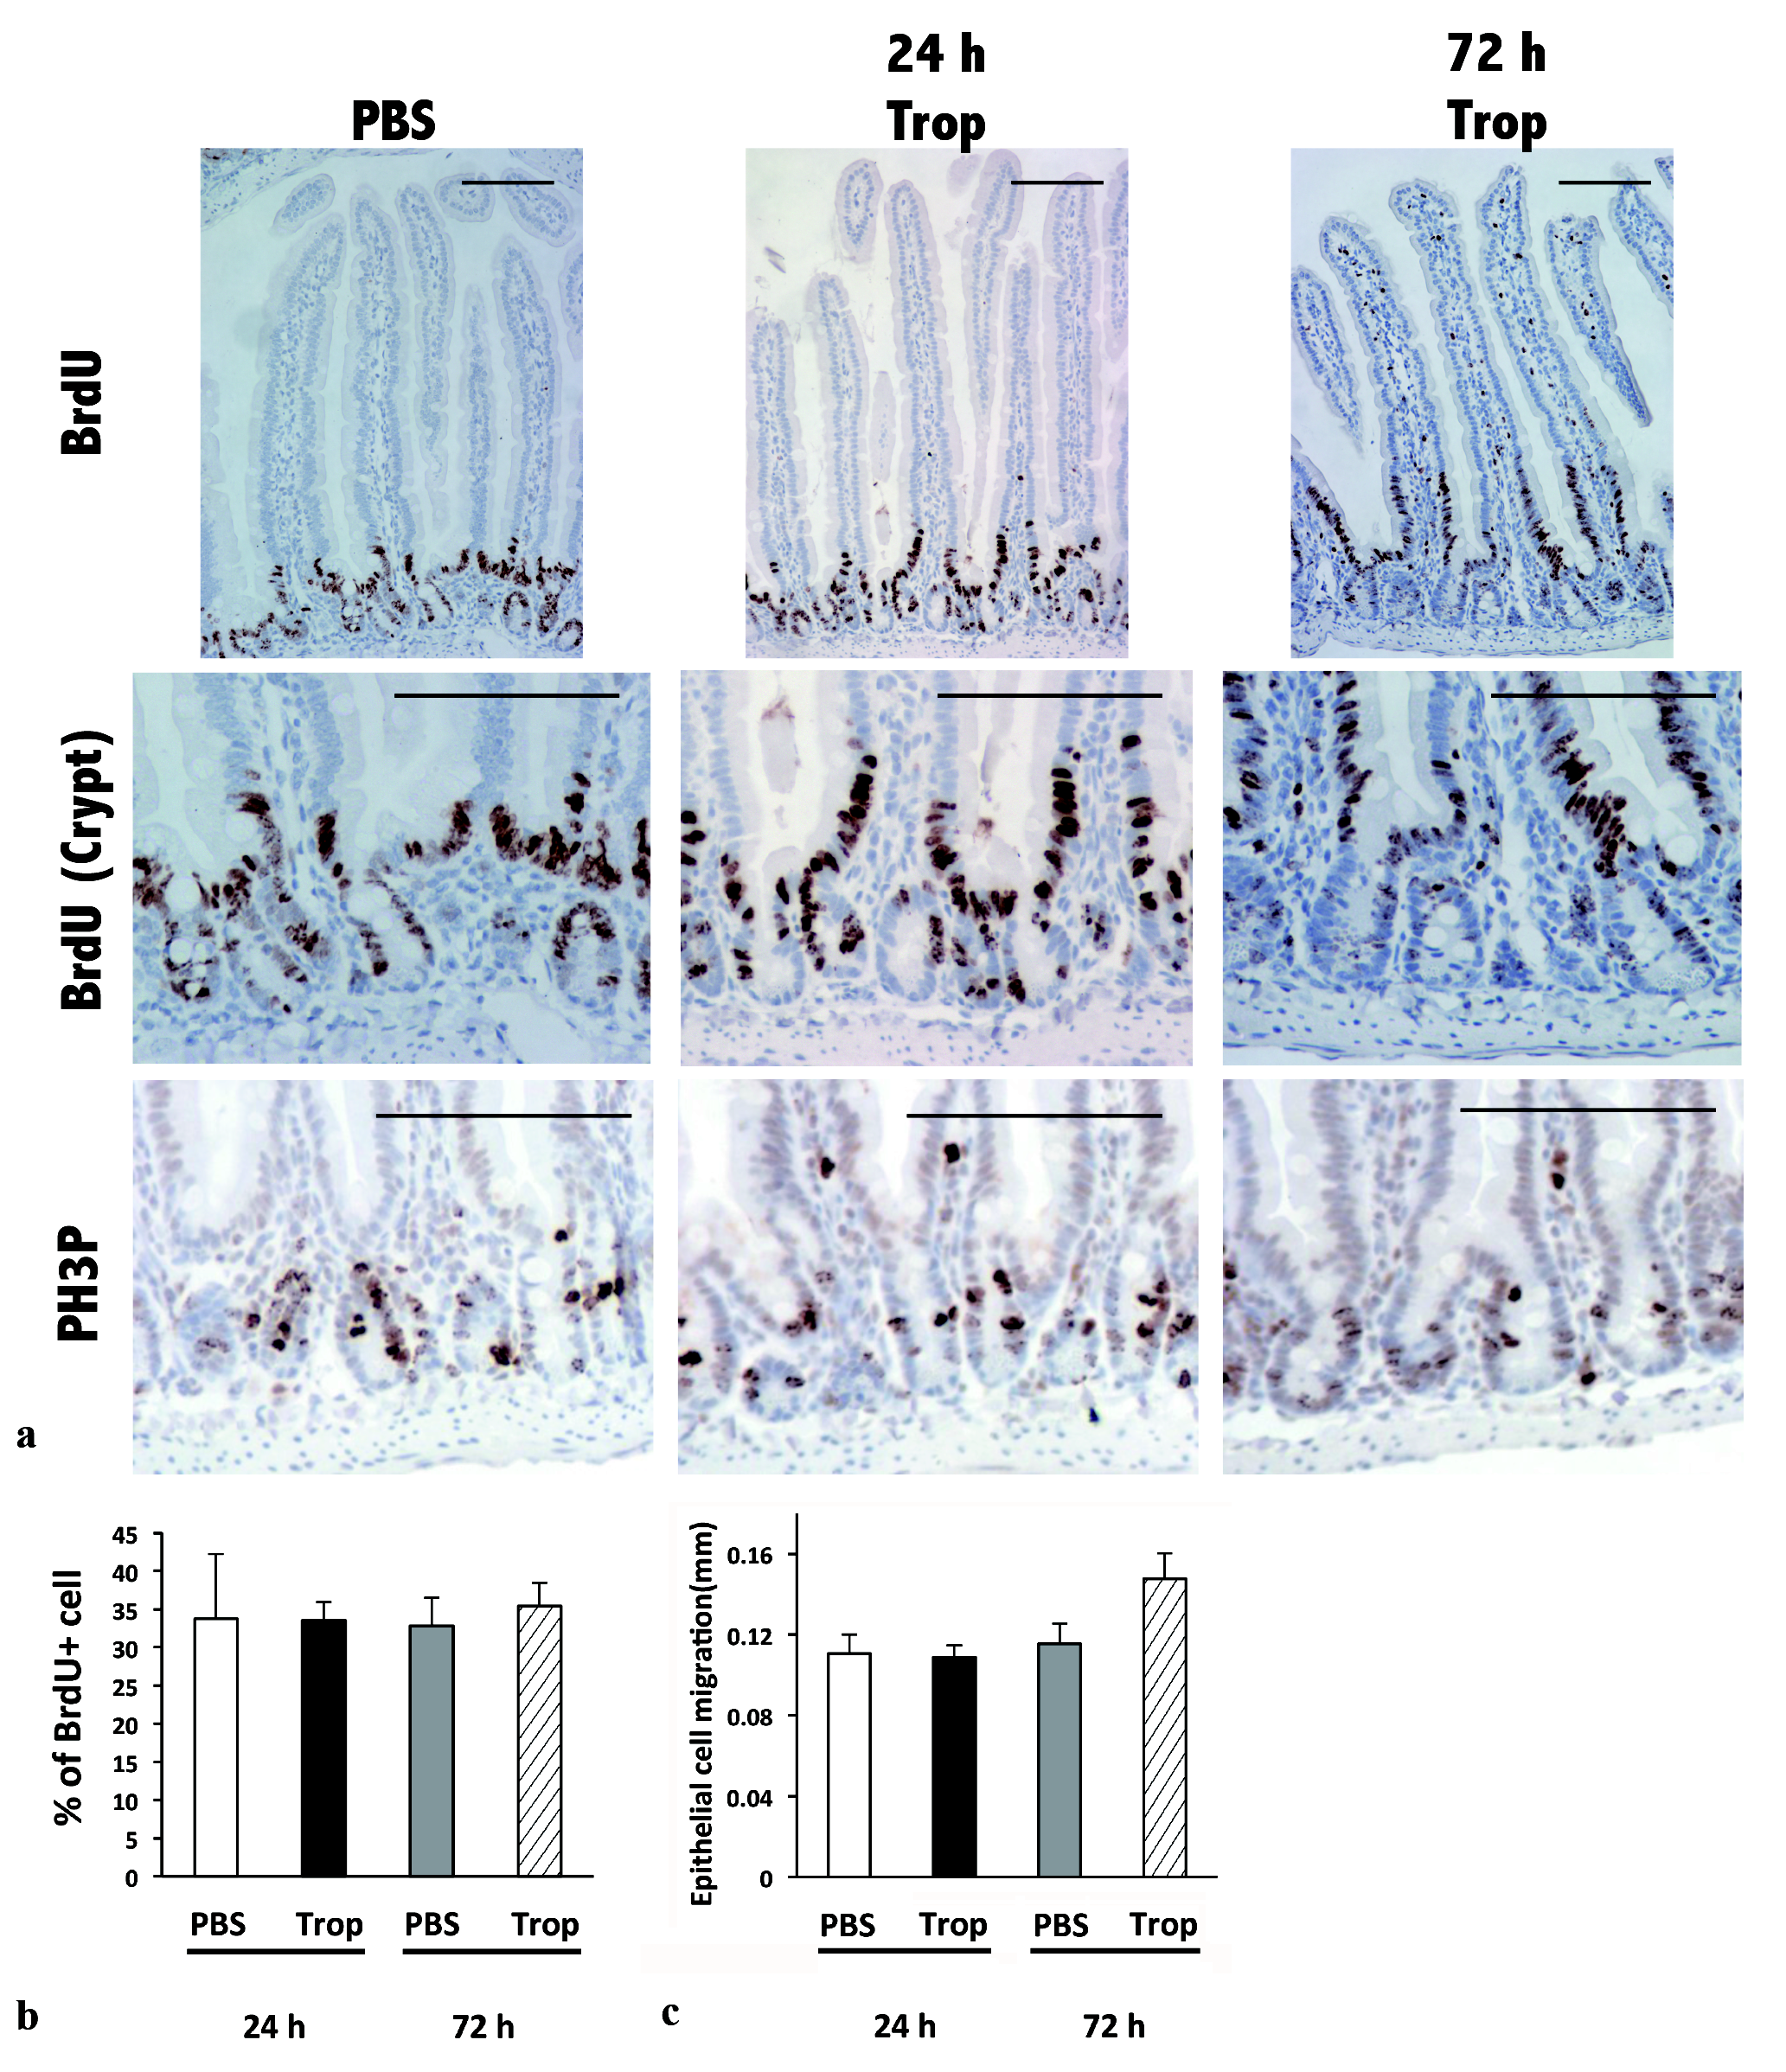

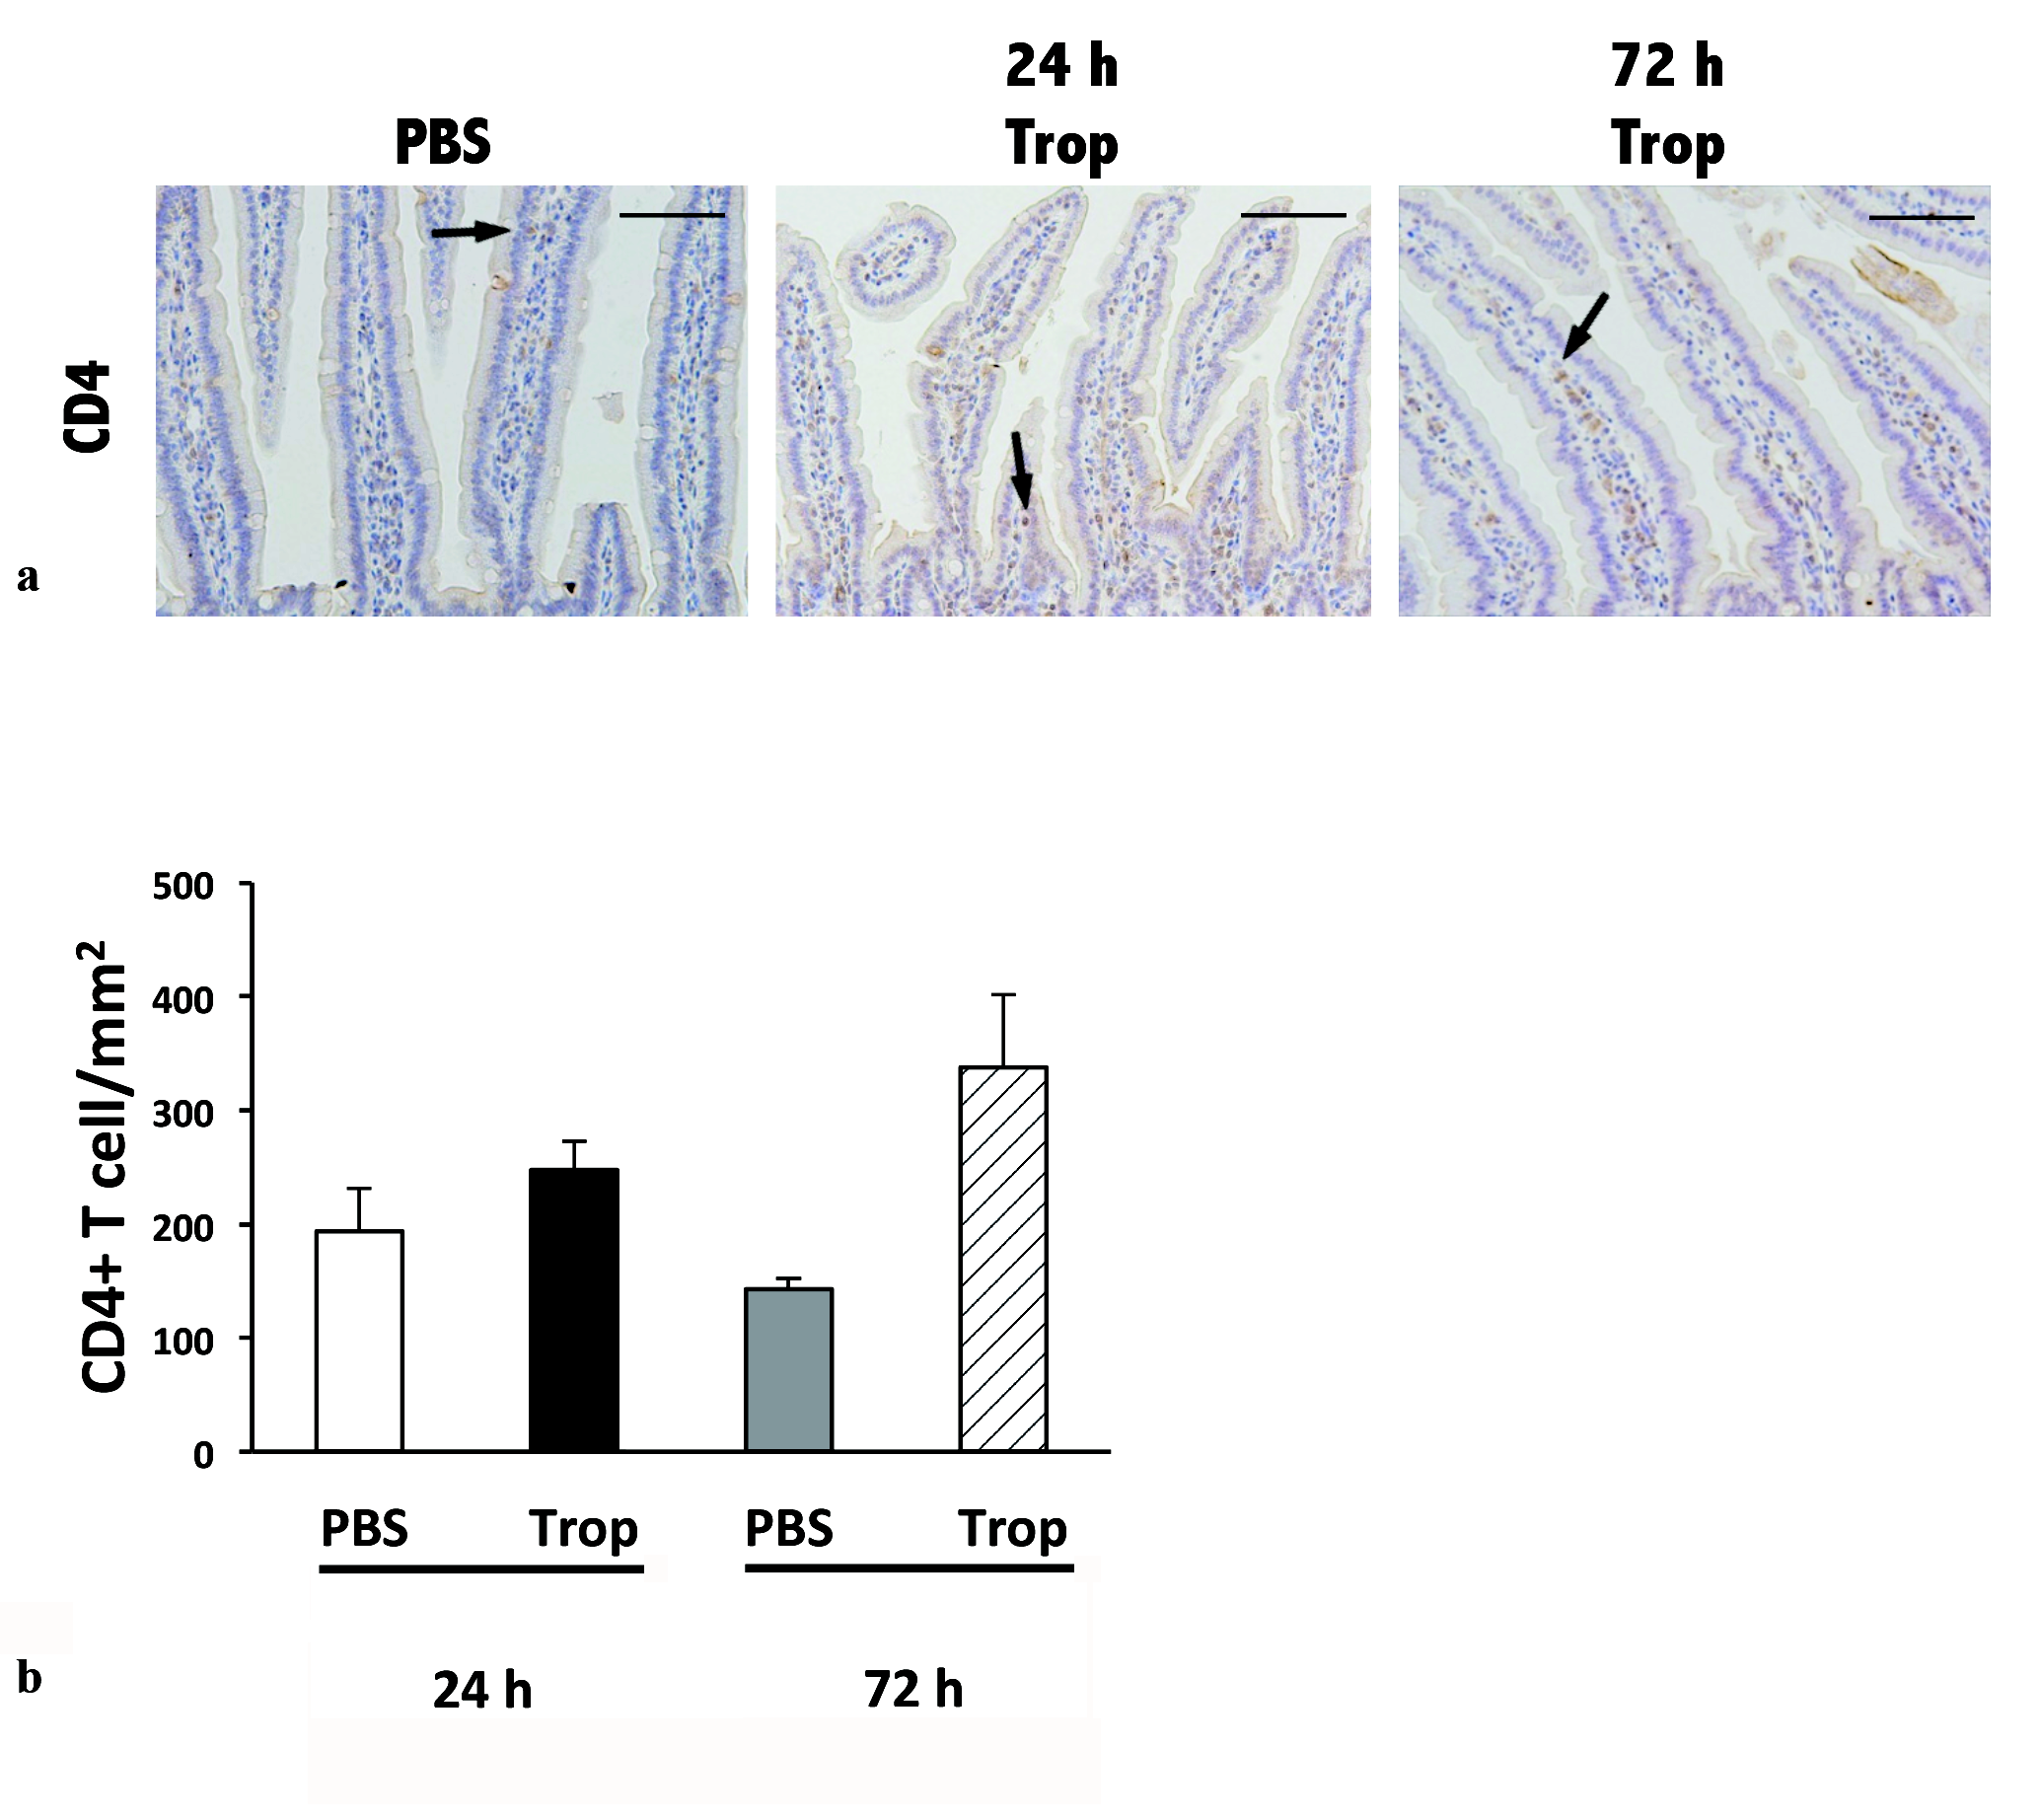


**Supplementary Fig. S1.** Sensitizing and challenging mouse with tropomyosin resulted in increased but no significant epithelial cell migration from crypt base (proliferative cell was stained brown in immunohistochemistry) in the duodenum. **a.** Representative sections of duodenum. **b.** Measurement of distance of proliferative cell migrated from crypt and (**c**) percentage of BrdU+ cell over total crypt cell of duodenum of control (n=3) and sensitized mice (n=6). Data are expressed as mean ± SEM. Bar = 100 µm. *PBS*, Mice fed with PBS; *Trop*, Mice fed with shrimp tropomyosin.

**Supplementary Fig. S2.** Sensitizing and challenging mouse with tropomyosin did not result in significant changes in the numbers of CD4+ T cells (arrows: CD4+ T cells stained brown in immunohistochemistry) in the duodenum, though a slightly increased infiltration was observed at 72 h after challenge. **a.** Representative sections of duodenum of PBS control mouse (left) and tropomysoin-sensitized mice, 24 h (middle) and 72 h (right) after challenge. **b.** Quantification of CD4+ T cell number in the duodenum control (n=3) and sensitized mice (n=6). Data are expressed as mean ± SEM. Bar = 100 µm. *PBS*, Mice fed with PBS; *Trop*, Mice fed with shrimp tropomyosin.
